# Supplementary material for: Defining Learning Outcomes as a Prerequisite of Implementing a Longitudinal and Transdisciplinary Curriculum with Regard to Digital Competencies at Hannover Medical School
Source: PubMed Central journal article supplement — J Med Educ Curric Dev. 2021 Jul 21;8:23821205211028347. doi: 10.1177/23821205211028347 (PMC8299879; doi:10.1177/23821205211028347), 2021-07-21
Supplement: sj-pdf-1-mde-10.1177_23821205211028347.pdf [file sj-pdf-1-mde-10.1177_23821205211028347.pdf]

## **Suppl. Constitution of an interdisciplinary project group**

When constituting a project group it was sought to cover different disciplines and varying levels of experience. The focus group consisted of

- two members of the dean's office (in detail the head of the department for curriculum development and one senior research associate working in the field of capacity and evaluation)
- one senior research associate of the institute for medical informatics
- one junior physician
- one senior physician (anesthetist)
- and one medical student.
