# Supplementary material for: Defining Learning Outcomes as a Prerequisite of Implementing a Longitudinal and Transdisciplinary Curriculum with Regard to Digital Competencies at Hannover Medical School
Source: PubMed Central journal article supplement — J Med Educ Curric Dev. 2021 Jul 21;8:23821205211028347. doi: 10.1177/23821205211028347 (PMC8299879; doi:10.1177/23821205211028347), 2021-07-21
Supplement: sj-pdf-2-mde-10.1177_23821205211028347.pdf [file sj-pdf-2-mde-10.1177_23821205211028347.pdf]

**Table 2**

MHH catalog of learning outcomes with regard to digital competencies classified in five domains 1) - 5).

| <b>No.</b> | <b>Learning outcome</b>                                                                                                                                                 | <b>reference to NKL-MI catalog<sup>18</sup></b> | <b>reference to IMIA catalog<sup>6</sup></b><br>no. of objective in IMIA-catalog which addresses the respective topic | <b>reference to NKLM catalog</b><br>(version of 2015) <sup>13</sup>       |
|------------|-------------------------------------------------------------------------------------------------------------------------------------------------------------------------|-------------------------------------------------|-----------------------------------------------------------------------------------------------------------------------|---------------------------------------------------------------------------|
| 1.1.1      | can explain and use criteria for formal and content-related quality of data (i.e. primary and secondary data collection sources).                                       | 1.3; 1.5                                        | -                                                                                                                     | 11.2.3.1                                                                  |
| 1.1.2      | can describe the meaning of “characters”, “data”, “information” and “knowledge” and their content-wise interrelation.                                                   | -                                               | 14                                                                                                                    | -                                                                         |
| 1.1.3      | can explain how data are digitalized (representation of data).                                                                                                          | -                                               | 14                                                                                                                    | -                                                                         |
| 1.1.4      | can describe different forms of data analysis and their differences (descriptive statistics, cluster analysis, data mining, near neighbours etc.).                      | -                                               | 14                                                                                                                    | -                                                                         |
| 1.1.5      | can explain principles of storage and exchange of data (i.e.(amongst others) the FAIR principles).                                                                      | 5.2; 5.3; 6.3                                   | 14,27                                                                                                                 | -                                                                         |
| 1.1.6      | can explain the structure and function of databases, data warehouse, data integration center and can apply them sufficiently as well as in patient care as in research. | 1.4; 1.5; 7.4; 9.4                              | 14, 27                                                                                                                | 14c.6.3<br>19.1.10.1<br>(databases are mentioned without further details) |

|                                                   |                                                                                                                                                                                                          |          |       |                                                                                             |
|---------------------------------------------------|----------------------------------------------------------------------------------------------------------------------------------------------------------------------------------------------------------|----------|-------|---------------------------------------------------------------------------------------------|
| 1.1.7                                             | is familiar with the opportunities and challenges of knowledge representation (i.e. formalization of medical knowledge, models for medical knowledge, rule-based model, linking medical knowledge etc.). | 4.1      | 27,35 | -                                                                                           |
| 1.1.8                                             | can describe different approaches in the context of artificial intelligence (neuronal networks, soft computing) and can explain their differences.                                                       | 4.2      | 35    | -                                                                                           |
| 1.1.9                                             | can explain basic uses of artificial intelligence in medicine and can give examples of their clinical usage (i.e. deep learning, machine learning).                                                      | 4.2; 4.3 | 37    | -                                                                                           |
| <b>1.2) recherche and management of knowledge</b> |                                                                                                                                                                                                          |          |       |                                                                                             |
| 1.2.1                                             | can explain and use criteria for formal and content-related quality of information.                                                                                                                      | -        | -     | -                                                                                           |
| 1.2.2                                             | can explain cognitive processing of information (perception, storage, further processing).                                                                                                               | -        | 37    | -                                                                                           |
| 1.2.3                                             | masters effective research strategies to solve a problem according to the best available evidence.                                                                                                       | 7        | 5     | 6.1.2.2; 6.2.2.2; 14a.1.1.2                                                                 |
| 1.2.4                                             | can provide qualitative criteria for a proficient utilization of electronic information sources and medical software (i.e. apps) for acquisition of state of the science knowledge.                      | 7        | 4     | 19.1.10.2; 19.1.10.3 (electronic information sources are mentioned without further details) |

## Domain 2) digital infrastructure of the health system

### 2.1) information systems

|       |                                                                                                                                                                                                                                                                |          |                                   |                                                                                  |
|-------|----------------------------------------------------------------------------------------------------------------------------------------------------------------------------------------------------------------------------------------------------------------|----------|-----------------------------------|----------------------------------------------------------------------------------|
| 2.1.1 | can explain the necessity of systematic information processing in a digitalized health care system.                                                                                                                                                            | 3        | 2                                 | -                                                                                |
| 2.1.2 | “can formulate requirements for departmental systems and provide feedback to existing systems.<br>–Requirement specifications, performance and functional specifications<br>–Procurement processes, tendering procedures, role of the physician” <sup>18</sup> | = 3.3    | 19                                | 8                                                                                |
| 2.1.3 | can describe the responsibility of physicians with respect to the operation and utilization of IT systems in outpatient care and in hospitals (IT-governance).                                                                                                 | 3.3; 3.9 | 8<br>(IT governance is addressed) | 10.7.1.3                                                                         |
| 2.1.4 | can explain the information system life cycle.                                                                                                                                                                                                                 | -        | 31                                | -                                                                                |
| 2.1.5 | can explain and apply basic principles of systematic electronic information processing in a hospital and in outpatient care (in German: KIS, KAS).                                                                                                             | 3        | 6,7,8,12,30                       | 19.1.; 10.3<br>(KIS and KAS are mentioned are mentioned without further details) |
| 2.1.6 | can give examples of information systems in health care and can exemplify possible sources of error within these information systems.                                                                                                                          | 3.1; 3.7 | 31                                | 14c.6.3.2;<br>10.6.1.5, 17.1.6                                                   |
| 2.1.7 | can describe challenges and pitfalls regarding electronic inter-and intraorganizational                                                                                                                                                                        | 5.2      | 7,10                              | -                                                                                |

|                                              |                                                                                                                                                                                                                                                                                |                                                                                           |                                                                            |                                                                                                               |
|----------------------------------------------|--------------------------------------------------------------------------------------------------------------------------------------------------------------------------------------------------------------------------------------------------------------------------------|-------------------------------------------------------------------------------------------|----------------------------------------------------------------------------|---------------------------------------------------------------------------------------------------------------|
|                                              | networks and regarding creation of suitable interfaces (i.e. user interfaces).                                                                                                                                                                                                 |                                                                                           |                                                                            |                                                                                                               |
| 2.1.8                                        | can explain the role and main characteristics of well-structured workflows and a well organized development of efficient problem-solving strategies (amongst others analysis, interdisciplinary exchange, identification of necessary measures and questions to be addressed). | 9.1                                                                                       | 13                                                                         | 8.4.1.1; 8.4.1.3; 14a.2.2.13                                                                                  |
| 2.1.9                                        | can explain the role of workflow and re-organisation in the sociotechnical context.                                                                                                                                                                                            | -                                                                                         | 13                                                                         | -                                                                                                             |
| <b>2.2) quality of medical documentation</b> |                                                                                                                                                                                                                                                                                |                                                                                           |                                                                            |                                                                                                               |
| 2.2.1                                        | can exemplify quality criteria for a well-structured and efficient documentation by physicians in IT-based systems.                                                                                                                                                            | 1.2; 1.5; 9.1                                                                             | 11                                                                         | 10.5.1.1., 11.2.3.4 (IT based documentation is mentioned without further details)                             |
| 2.2.2                                        | can give examples why medical documentation is obligatory and is familiar with the legal regulation of medical documentation.                                                                                                                                                  | 1.1; 1.5; 6.4                                                                             | 8                                                                          | 11.2.3.1                                                                                                      |
| 2.2.3                                        | can explain "advantages and disadvantages of different types of electronic documentation, their differences to paper documentation and the problems of media disruption." <sup>18</sup>                                                                                        | = 1.3                                                                                     | 26 (electronic data exchange is mentioned without further details)         | 11.2.3.1 (electronic documentation is mentioned without further details)                                      |
| 2.2.4                                        | can describe differences regarding construction and function of the electronic patient file, the electronic health record (EHR) and of patient-data-management                                                                                                                 | 3 (structure and function of EHR, PDMS is mentioned; differences of these systems are not | 9, 12 (PDMS and differences of these systems are not explicitly mentioned) | 14c.6.3.1, 14c.6.3.2, (structure and function of EHR, PDMS is mentioned; differences of these systems are not |

|                                                                                                                          |                                                                                                                                                                                       |                       |                  |                                                                                 |
|--------------------------------------------------------------------------------------------------------------------------|---------------------------------------------------------------------------------------------------------------------------------------------------------------------------------------|-----------------------|------------------|---------------------------------------------------------------------------------|
|                                                                                                                          | systems (PDMS).                                                                                                                                                                       | explicitly addressed) |                  | explicitly addressed)                                                           |
| 2.2.5                                                                                                                    | can reflect pitfalls and challenges when patients are identified electronically in healthcare facilities (i.e. consequences of the presence of multiple identifiers for one patient). | 3.6                   | 30               | -                                                                               |
| <b>3) scope of clinical application: utilizing digital tools in patient care and in the field of preventive medicine</b> |                                                                                                                                                                                       |                       |                  |                                                                                 |
| <b>3.1 signal and image processing</b>                                                                                   |                                                                                                                                                                                       |                       |                  |                                                                                 |
| 3.1.1                                                                                                                    | can give and explain examples for biosignals in medicine.                                                                                                                             | <b>= 8.1</b>          | 38               | -                                                                               |
| 3.1.2                                                                                                                    | can explain digital filtering of biosignals and can give clinical examples for this biosignal processing.                                                                             | 8.1                   | 38               | 12.8.2.5 (algorithms of image processing are mentioned without further details) |
| 3.1.3                                                                                                                    | can describe procedures of digital image enhancement.                                                                                                                                 | 8.3                   | 38               | 12.8.2.5 (see above)                                                            |
| 3.1.4                                                                                                                    | can describe different digital visualization processes and can explain their characteristic properties and peculiarities (i.e. artefacts).                                            | <b>= 8.5</b>          | -                | -                                                                               |
| 3.1.5                                                                                                                    | can describe the use of digital tools in an exemplary way in the fields of biomedical modelling and medical physics-, nano-, chemo-, and bioinformatics.                              | 9.4                   | 15, 39, 42,43,47 | 6.1.1.3 (6.1.1.3 refers very generally to the field of biomedical technology)   |

### 3.2) systems used for decision support and for support to determine a diagnosis

|       |                                                                                                                                                                                                     |                    |           |                                                                 |
|-------|-----------------------------------------------------------------------------------------------------------------------------------------------------------------------------------------------------|--------------------|-----------|-----------------------------------------------------------------|
| 3.2.1 | can give examples how patient safety can be strengthened by digital systems.                                                                                                                        | 1.1; 3.5; 7.4; 9.1 | 24        | 10.6.2<br>(10.6.2 refers to critical incident reporting system) |
| 3.2.2 | can explain the usage of digital tools as medical devices (from mobile applications (app) to cochlear implant devices).                                                                             | 3.7; 4.3; 6.4      | -         | -                                                               |
| 3.2.3 | can explain the functional principles of clinical decision support systems and can give examples for challenges in clinical decision support.                                                       | 4.1                | 3, 20, 35 | -                                                               |
| 3.2.4 | can reflectively integrate the use of digital tools such as apps and other smart devices in the clinical workflow.                                                                                  | 4                  | 9         | -                                                               |
| 3.2.5 | can give examples for usage of digital tools in the field of personalized medicine.                                                                                                                 | 4.3                | -         | -                                                               |
| 3.2.6 | can give examples and can describe basic conditions for the usage of electronic assistance systems in real life environment to improve health and living conditions (i.e. ambient assisted living). | 5.4                | 36,40     | -                                                               |
| 3.2.7 | can explain methods of virtual reality, assisted and augmented reality, computer-assisted surgery and computer assisted stereotactic methods.                                                       | -                  | -         | -                                                               |

### 3.3) telemedicine and telehealth

|     |                                                                                                                                                           |          |        |            |
|-----|-----------------------------------------------------------------------------------------------------------------------------------------------------------|----------|--------|------------|
| 3.3 | “can use telemedicine in a patient-oriented manner and can explain required structural conditions and telehealth-related legal frameworks.” <sup>13</sup> | 5.3; 5.4 | 10, 29 | = 10.7.1.5 |
|-----|-----------------------------------------------------------------------------------------------------------------------------------------------------------|----------|--------|------------|

### 4) medical-legal and ethical basics

|     |                                                                                                                                                                                                                                                          |                  |       |                                                                                                                      |
|-----|----------------------------------------------------------------------------------------------------------------------------------------------------------------------------------------------------------------------------------------------------------|------------------|-------|----------------------------------------------------------------------------------------------------------------------|
| 4.1 | can determine and reflect the responsibilities (physician/IT provider etc.) regarding data privacy and data protection along the interorganizational exchange of confidential patient data in the health system and along the use of central data bases. | 3,9; 6.1; 6.3    | 16    | 11.1.1.3; 11.1.2.1; 11.1.3.1                                                                                         |
| 4.2 | can explain the legal framework upon which an electronic system (software, device) is declared as a medical device.                                                                                                                                      | 4.3; 6.4         | -     | -                                                                                                                    |
| 4.3 | “can use, evaluate and choose appropriate digital procedures to securely transmit and store patient data.” <sup>13</sup>                                                                                                                                 | 6.1; 6.3; 6.4    | 8, 16 | = part of 14c.6.3.1                                                                                                  |
| 4.4 | masters pseudonymization as well as anonymization of patient data for research purposes and can explain the difference of pseudonymisation and anonymization. <sup>18</sup>                                                                              | = content of 6.2 | -     | 10.7.1.4; 11.1.3.1 (anonymization and pseudonymization are named without further details regarding their difference) |

|                                                                      |                                                                                                                                                                                          |               |        |                                                                                                               |
|----------------------------------------------------------------------|------------------------------------------------------------------------------------------------------------------------------------------------------------------------------------------|---------------|--------|---------------------------------------------------------------------------------------------------------------|
| 4.5                                                                  | can explain the legal and ethical frameworks and the challenges with respect to data protection when using digital tools and digital communication media.                                | 6.1; 6.3; 6.4 | 16, 22 | -                                                                                                             |
| <b>5) transformation processes in medicine due to digitalization</b> |                                                                                                                                                                                          |               |        |                                                                                                               |
| 5.1                                                                  | can describe the historical evolution of informatics and medical informatics as a discipline and as a profession.                                                                        | -             | 1      | -                                                                                                             |
| 5.2                                                                  | can name principle tasks of medical and health informatics.                                                                                                                              | -             | -      | -                                                                                                             |
| 5.3                                                                  | can explain the contribution of the interface of medicine and medical informatics for the further development in medicine with the help of practical examples from the clinical setting. | 6.5           | 41     | -                                                                                                             |
| 5.4                                                                  | can give examples for innovative advancements in the field of medical informatics that foster progress in medicine.                                                                      | 6.5           | 41     | 6.1.1.3<br>(general advancements in medicine are mentioned without explicit reference to medical informatics) |
| 5.5                                                                  | "can explain the impact of new technological advancements on the physician/patient relationship." <sup>13</sup>                                                                          | 5             | -      | <b>= 11.4.3.5</b>                                                                                             |
| 5.7                                                                  | can reflectively evaluate the impact of digital devices and services (i.e. data from wearables, social                                                                                   | 5             | 9      | -                                                                                                             |



|      |                                                                                                                                                                                                                                                                |                                 |        |     |
|------|----------------------------------------------------------------------------------------------------------------------------------------------------------------------------------------------------------------------------------------------------------------|---------------------------------|--------|-----|
|      | media services) on the physician/patient communication and relation.                                                                                                                                                                                           |                                 |        |     |
| 5.8  | masters to convey a differentiated and goal-directed utilization of modern information technology to patients with the aim to increase the capacity of patients to gain an active role in their personal healthcare (= fostering the empowerment of patients). | 4.4                             | 9      | -   |
| 5.9  | can adjust their acting flexibly with regard to changing requirements in a digitalized working environment.                                                                                                                                                    | -                               | -      | 6.1 |
| 5.10 | can proactively reflect transformational changes within the healthcare system with respect to the physician's role.                                                                                                                                            | -                               | 41, 46 | 6.1 |
| 5.11 | can describe basic principles of the network architecture of information and communication technology (client server architecture, protocols, services).                                                                                                       | -                               | 29     | -   |
| 5.12 | can describe basic components of theoretical and practical informatics (i.e. most common programming languages, software architecture, cryptography).                                                                                                          | 6.3 (cryptography is mentioned) | 27,28  | -   |
| 5.13 | can give examples for the use of digital methods to foster learning processes.                                                                                                                                                                                 | 9.3                             | 18     | -   |

|      |                                                                                                                                   |   |   |   |
|------|-----------------------------------------------------------------------------------------------------------------------------------|---|---|---|
|      |                                                                                                                                   |   |   |   |
| 5.14 | can give examples for unjustified discriminatory conclusions by use of learning digital systems (i.e. gender bias in algorithms). | - | - | - |

The three columns on the right list the number of closely related learning outcomes of the NKL-MI<sup>18</sup>, the IMIA catalog<sup>6</sup> and the NKLM catalog<sup>13</sup>

Learning outcomes whose wording was taken over one to one from the NKL-MI<sup>18</sup> or the NKLM<sup>13</sup> catalog are set in quotation marks.

Those learning outcomes of the NKL-MI<sup>18</sup> and the NKLM<sup>13</sup> catalog which are given in bold letters and signed by “=” indicate that the respective learning outcome of the MHH catalog was derived from the NKL-MI<sup>18</sup> or the NKLM<sup>13</sup> catalog contentwise. Wording was slightly adapted in these cases. Therefore these outcomes are not set in quotation marks.
