# Supplementary material for: Defining Learning Outcomes as a Prerequisite of Implementing a Longitudinal and Transdisciplinary Curriculum with Regard to Digital Competencies at Hannover Medical School
Source: PubMed Central journal article supplement — J Med Educ Curric Dev. 2021 Jul 21;8:23821205211028347. doi: 10.1177/23821205211028347 (PMC8299879; doi:10.1177/23821205211028347), 2021-07-21
Supplement: sj-pdf-3-mde-10.1177_23821205211028347.pdf [file sj-pdf-3-mde-10.1177_23821205211028347.pdf]

## Table 3

Competence levels

| Competence level |                                            | Description                                                                      |
|------------------|--------------------------------------------|----------------------------------------------------------------------------------|
| 1                | Referenced knowledge                       | The student is familiar with the addressed issue and can reproduce its content.  |
| 2                | Applied factual and conceptual knowledge   | The student is able to explain the content.                                      |
| 3a               | Applied knowledge and practical experience | The student is able to perform and apply the respective issue under supervision. |
| 3b               | Applied knowledge and practical experience | The student is able to perform fully independently.                              |

Level of competency as described in the NKLM<sup>13</sup> and by Röhrig et al.<sup>16</sup>

All members of the project group evaluated at which competence level learning outcomes should be taught at each academic year.
